# Supplementary material for: Synthesis and characterization of ZnS with controlled amount of S vacancies for photocatalytic H2 production under visible light
Source: PubMed Central journal article supplement (PMC4339798; doi:10.1038/srep08544), 2015-02-25
Supplement: srep08544-s1.pdf [file srep08544-s1.pdf]

Supporting information

**Synthesis and characterization of ZnS with controlled amount of S vacancies for photocatalytic H<sub>2</sub> production under visible light**

Gang Wang,<sup>1</sup> Baibiao Huang,\*<sup>1</sup> Zhujie Li,<sup>2</sup> Zaizhu Lou,<sup>1</sup> Zeyan Wang,<sup>1</sup> Ying Dai,<sup>2</sup> and Myung-Hwan Whangbo<sup>3</sup>

<sup>1</sup>State Key Laboratory of Crystal Materials, <sup>2</sup>School of Physics, Shandong University, Jinan 250100, People's Republic of China

<sup>3</sup>Department of Chemistry, North Carolina State University, Raleigh, North Carolina 27695-8205, USA

Correspondence to [bbhuang@sdu.edu.cn](mailto:bbhuang@sdu.edu.cn)

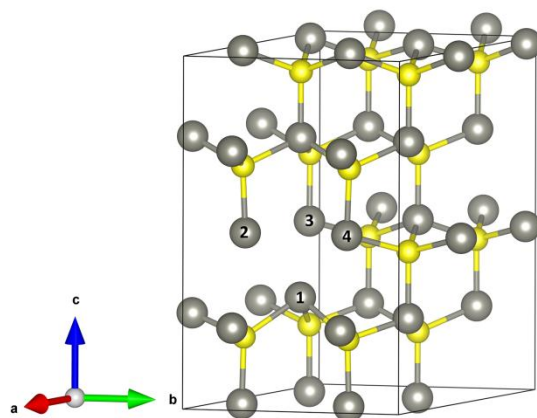

Figure S1. The structure of ZnS with one S atom vacancy in a 32-atom  $2 \times 2 \times 2$  supercell. The labels 1 – 4 refer to the four Zn atoms surrounding the S vacancy.

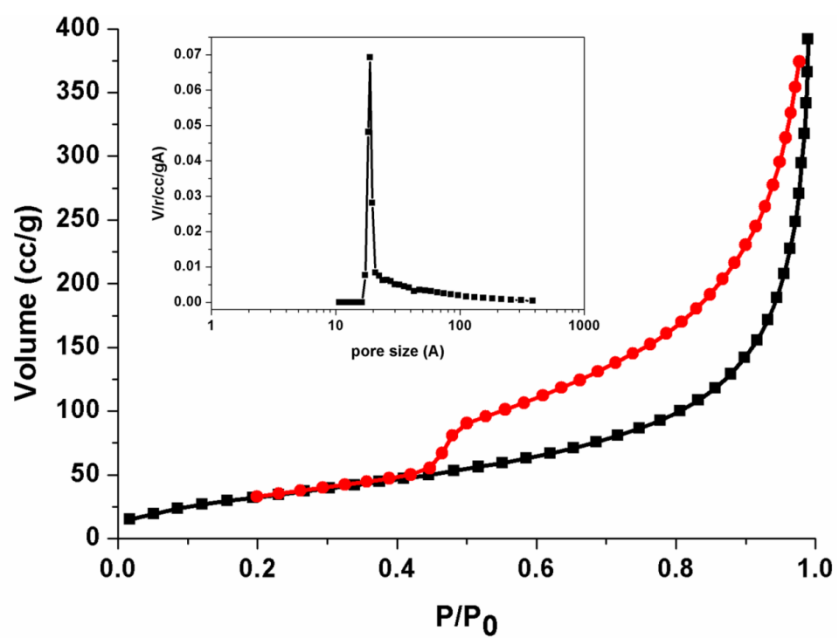

Figure S2. The isotherms of N<sub>2</sub> adsorption onto ZnS samples (obtained by using 0.01 mol NaBH<sub>4</sub>) and together with the pore size distributions (the inset).

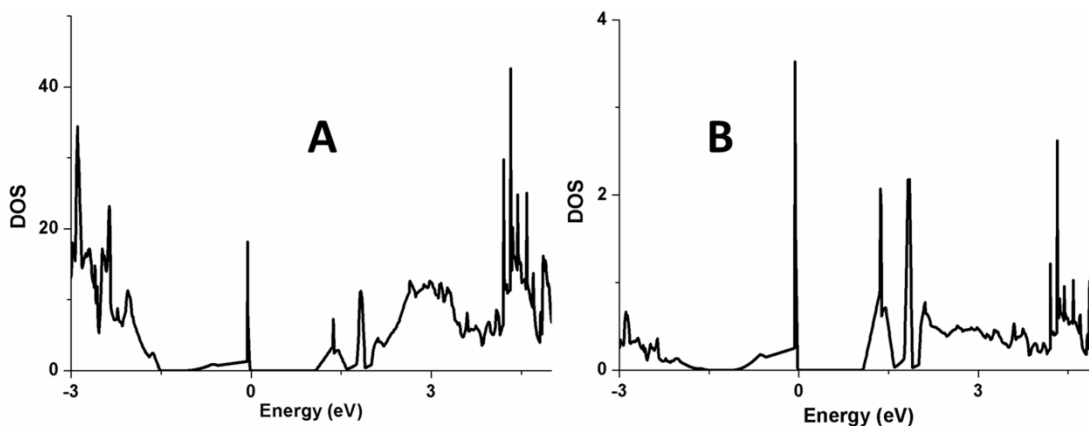

Figure S3. (A) The total DOS plot calculated for ZnS with one S vacancy in a  $2 \times 2 \times 2$  supercell, for which the geometry relaxation was not included. (B) The projected DOS plot calculated for the four Zn atoms surrounding the S vacancy.

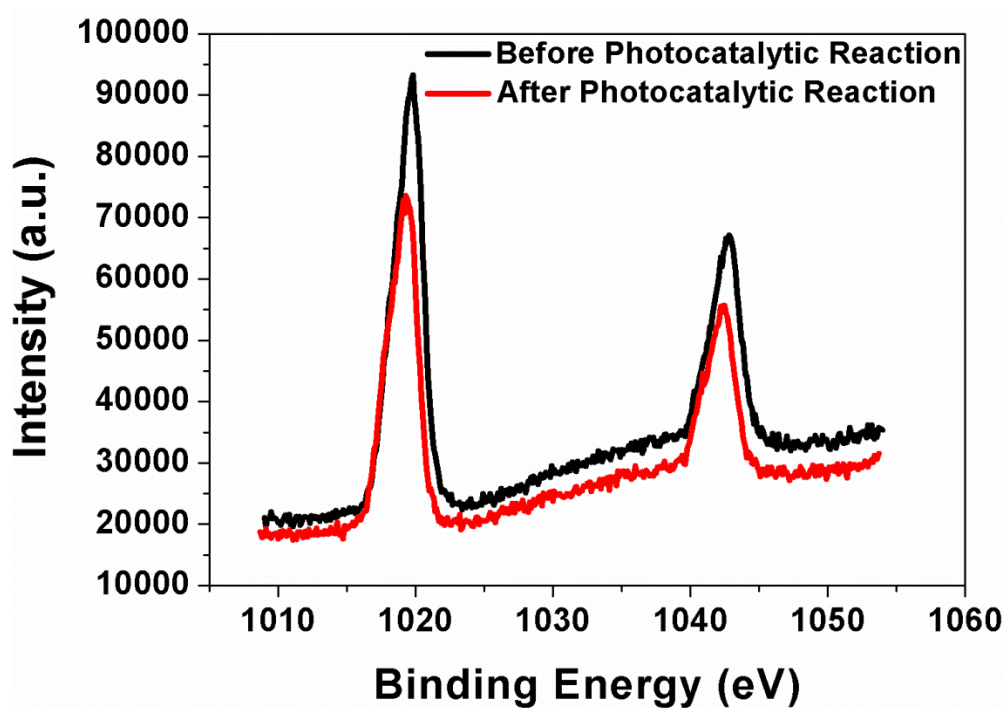

Figure S4. XPS results of ZnS sample (0.01 mol  $\text{NaBH}_4$ ) before and after photocatalytic reaction.

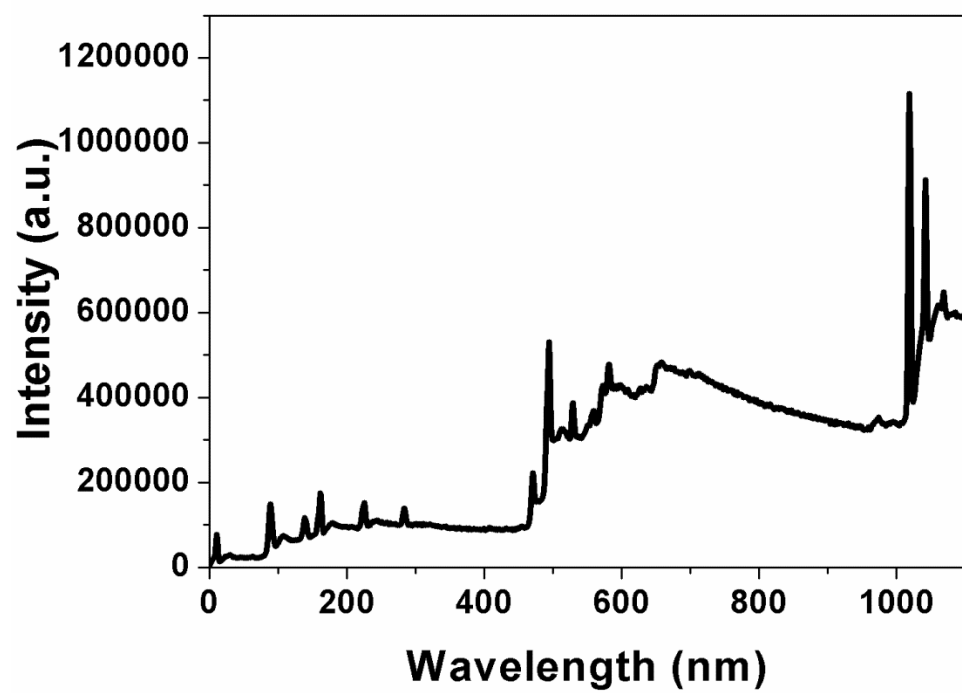

Figure S5. Full XPS survey scan of vacancy ZnS which obtained by adding 0.01 mol NaBH<sub>4</sub>

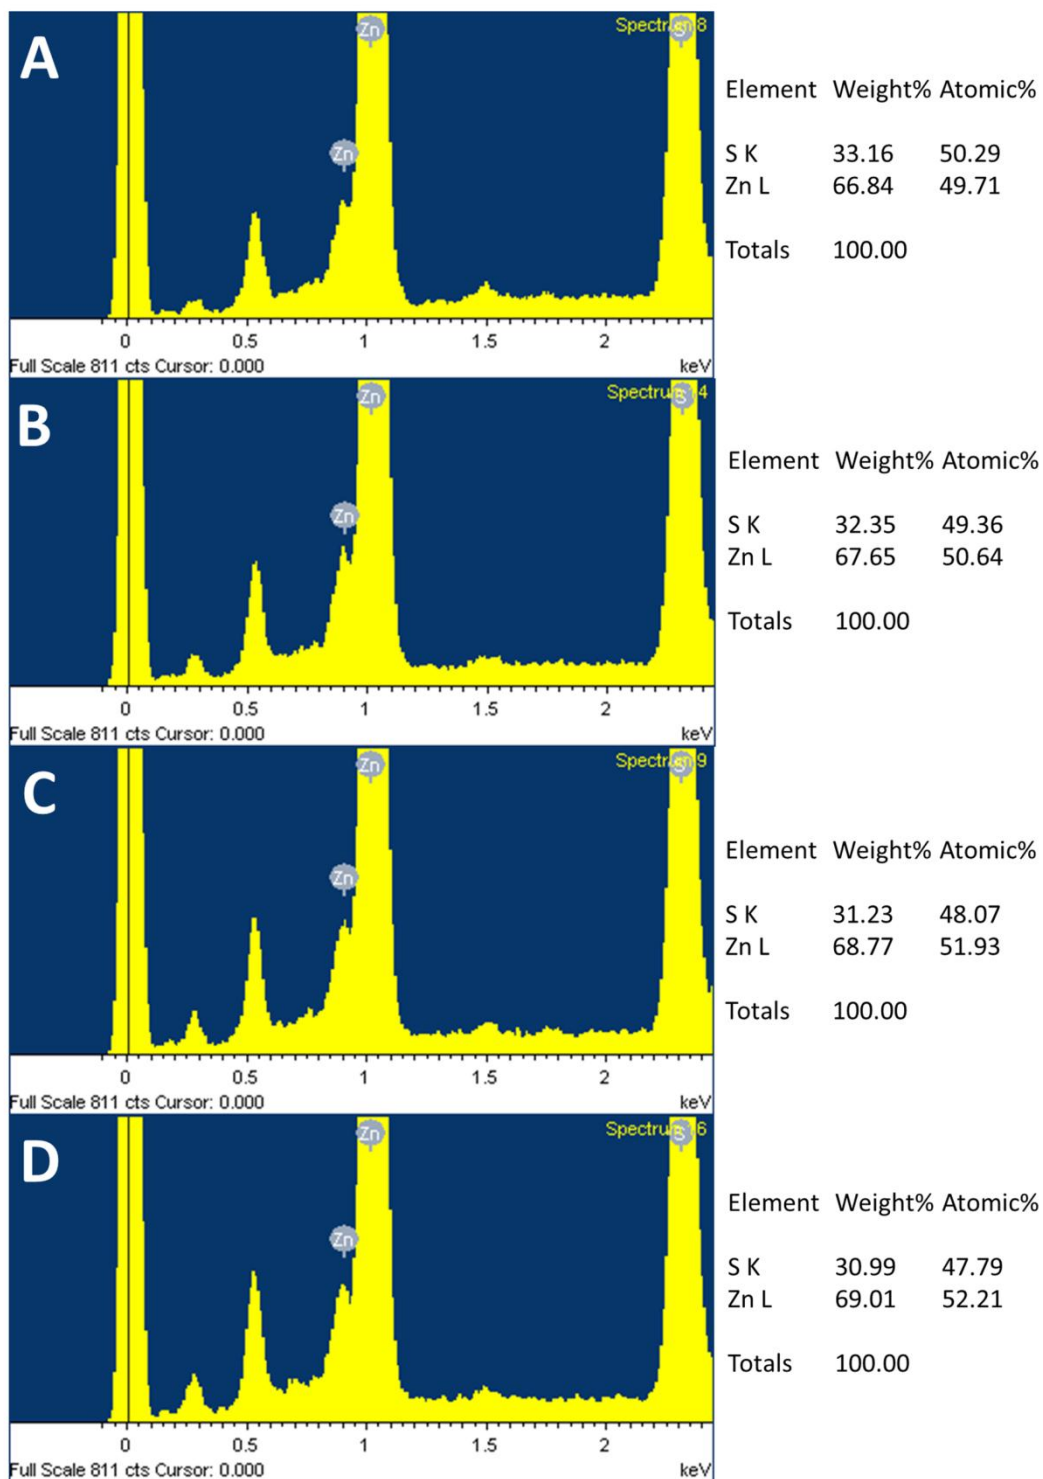

Figure S6. EDS spectrum and detailed information about the composition of different ZnS samples. A is ZnS<sup>ref</sup>, B-D are vacancy ZnS with different NaBH<sub>4</sub> added during synthesized (0, 0.01, 0.02 mol).

High resolution XPS of spectrum of S in different ZnS samples are show in Figure S7, the standard binding energy of S 2p<sub>3/2</sub> in ZnS<sup>ref</sup> was about 161.2 eV<sup>1</sup>. As the increasing of NaBH<sub>4</sub>, the binding energy of obtained samples gradually shifted to higher direction.

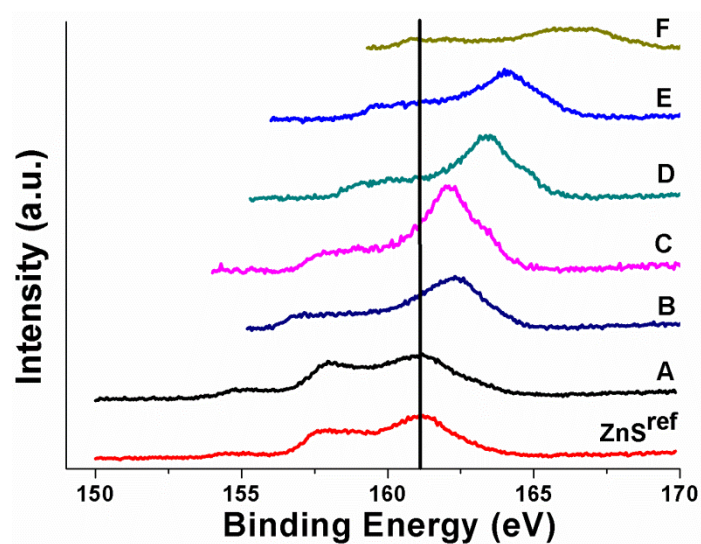

Figure S7. High-resolution XPS spectrum of S in different ZnS samples. (A) 0, (B) 0.003, (C) 0.005, (D) 0.01, (E) 0.02, and (F) 0.03 mol of NaBH<sub>4</sub>.

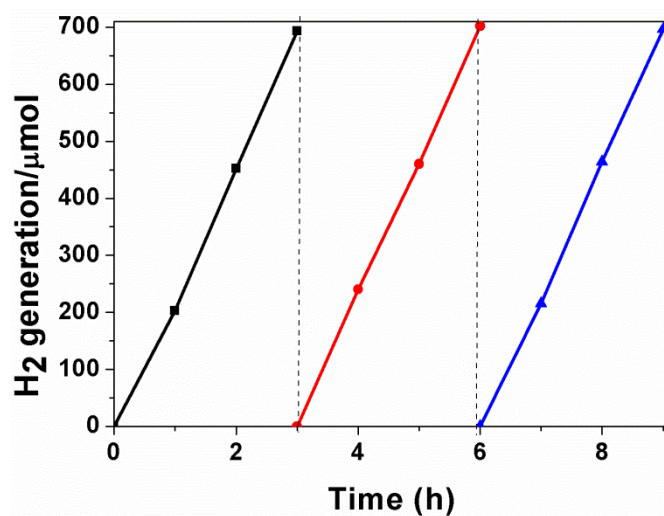

Figure S8. Hydrogen evolution rate of ZnS (0.01 mol) sample in the cyclic test.

[1] Liu, J; Wen, S. M. et. al, Dissolubility and surface properties of a natural sphalerite in aqueous solution. *Miner. Metall. Proc.* **29**, 113-120 (2012).
